# Supplementary material
Source: PubMed Central journal article supplement (PMC4120952)
Supplement: NIHMS600422-supplement-sTable_1.pdf [file NIHMS600422-supplement-sTable_1.pdf]

| Target | Forward qPCR Primer           | Reverse qPCR Primer          |
|--------|-------------------------------|------------------------------|
| MCP-1  | 5'-GCTCAGCCAGATGCAGTTAACGC-3' | 5'-TGGGGTCAGCACAGACCTCTCT-3' |
| p15    | 5'-ATCCCAACGCCGTCAAC-3'       | 5'-ATCATGCACAGGTCTGGTG-3'    |
| p16    | 5'-TGCAGATAGACTAGCCAGGG-3'    | 5'-AGAGCTGCCACTTTGACG-3'     |
| p18    | 5'-GAACCTGCCCTTGCACTTGGC-3'   | 5'-TCCCCAACCCCATTCGCCTC-3'   |
| p19    | 5'-TCGCACATGATGATCCCAA-3'     | 5'-TTTGTTGACAAGTAACCCA-3'    |
| p57    | 5'-GGAGCAGGACGAGAATCAG-3'     | 5'-TTCGACGCCTTGTTCTCC-3'     |
| 18S    | 5'-GCCGCTAGAGGTGAAATTCTTG-3'  | 5'-CTTTCGCTCTGGTCCGTCTT-3'   |

**sTable 1.** Primer sequences for quantitative PCR.
