# Supplementary material
Source: PubMed Central journal article supplement (PMC4120952)

# sFigure 1

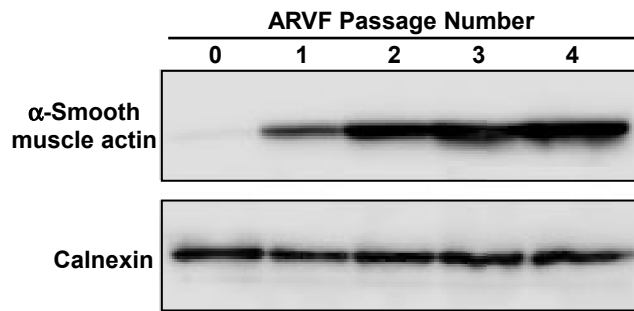

## sFigure 2

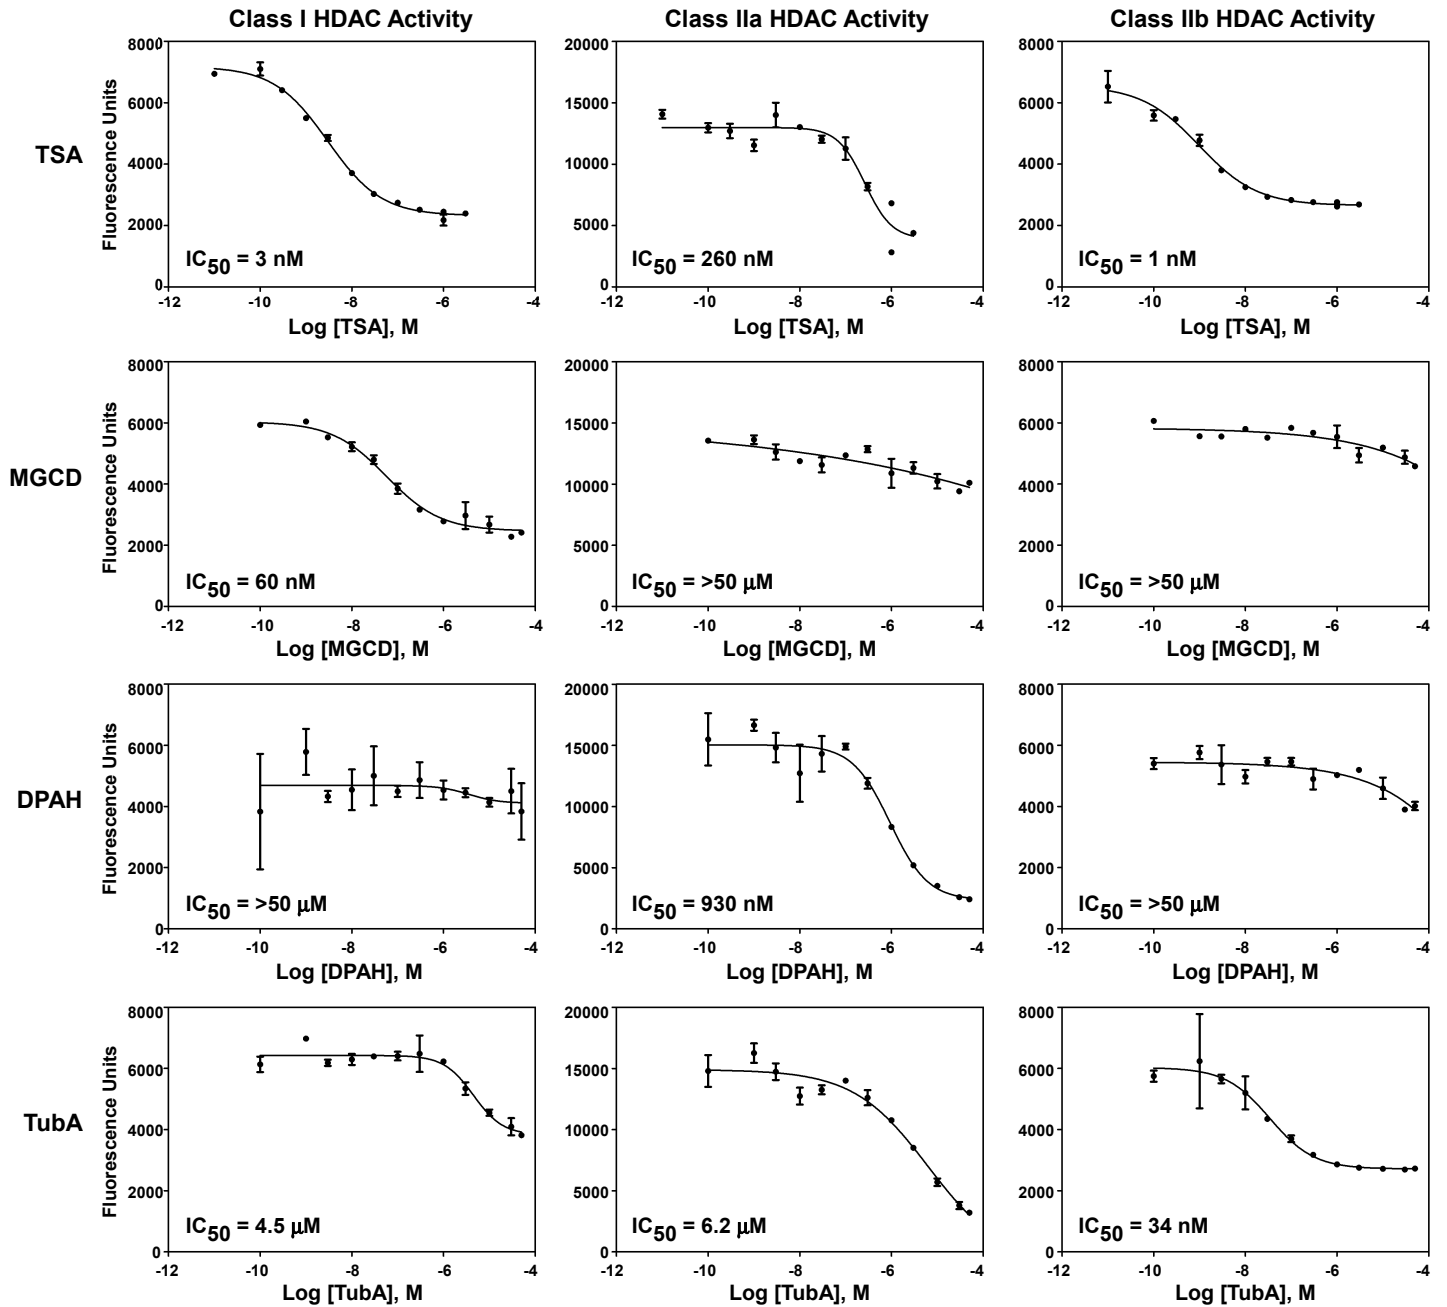

**sFigure 3**

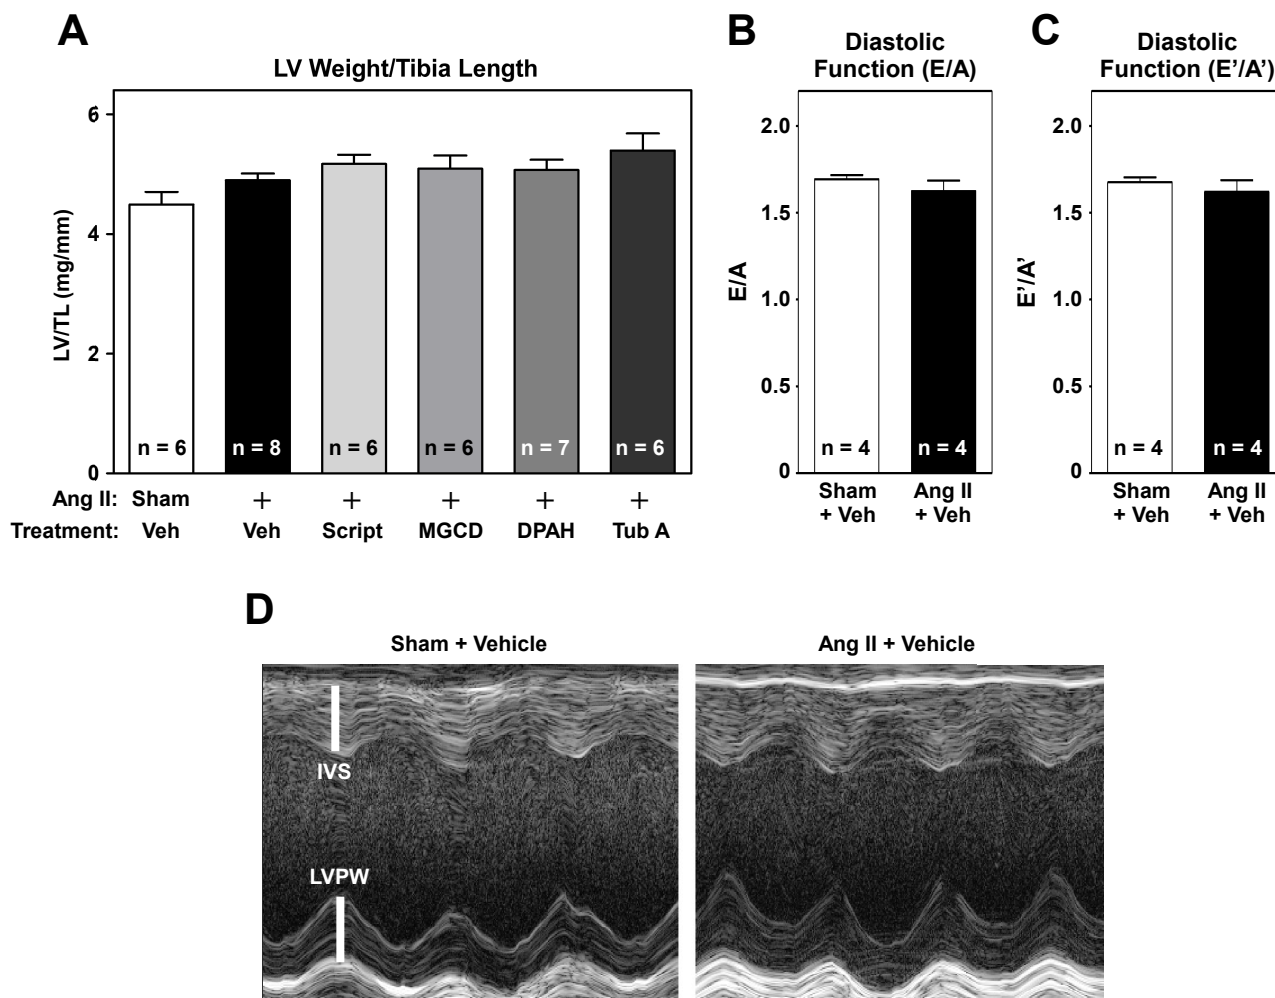

## sFigure 4

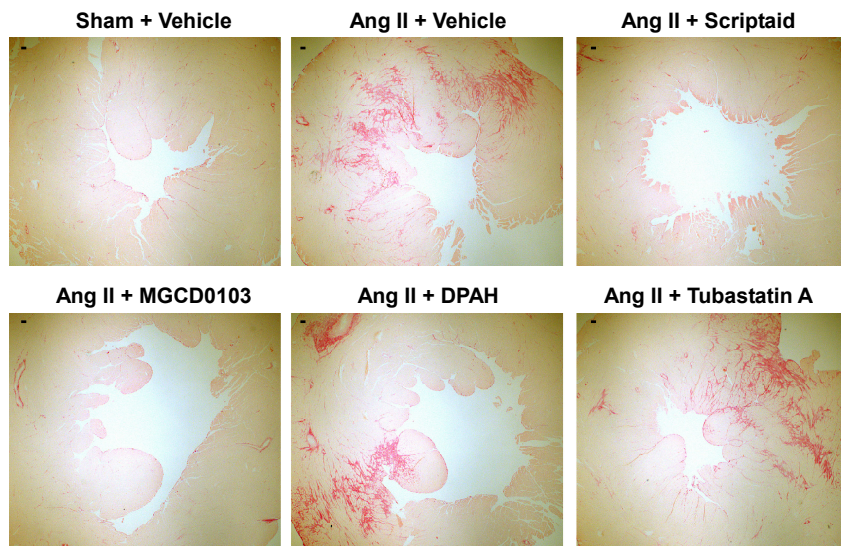

## sFigure 5

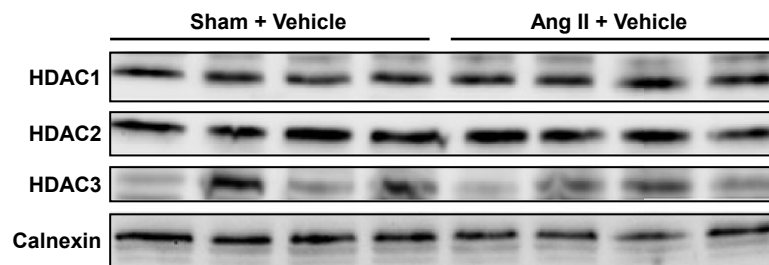

# sFigure 6

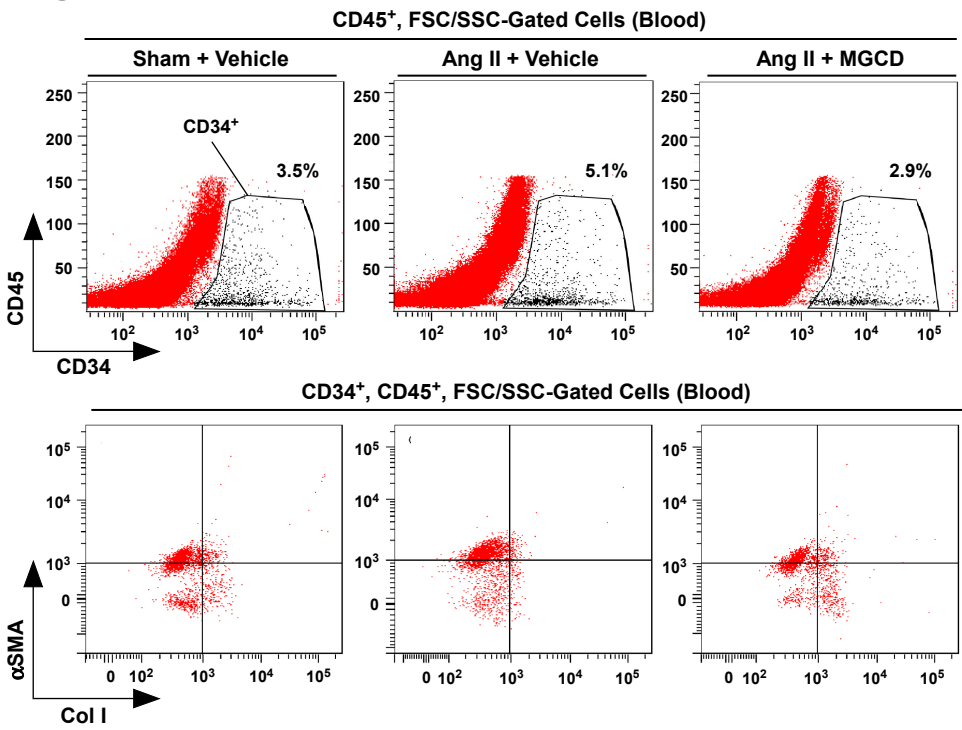

# sFigure 7

## A

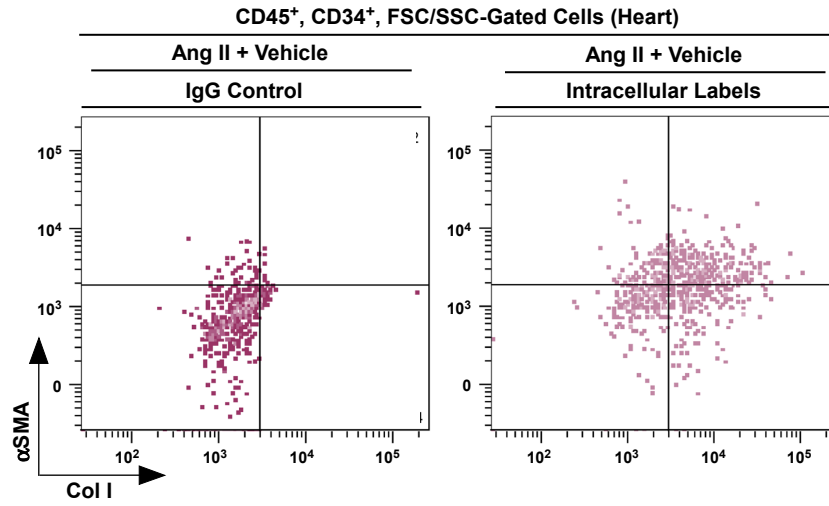

## B

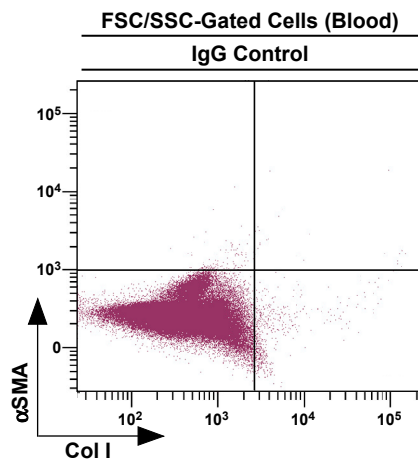

## C

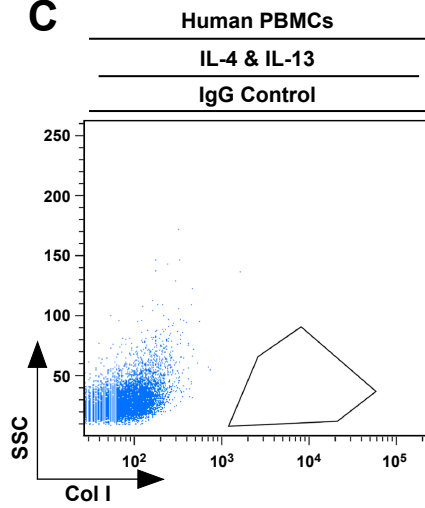

**sFigure 8**

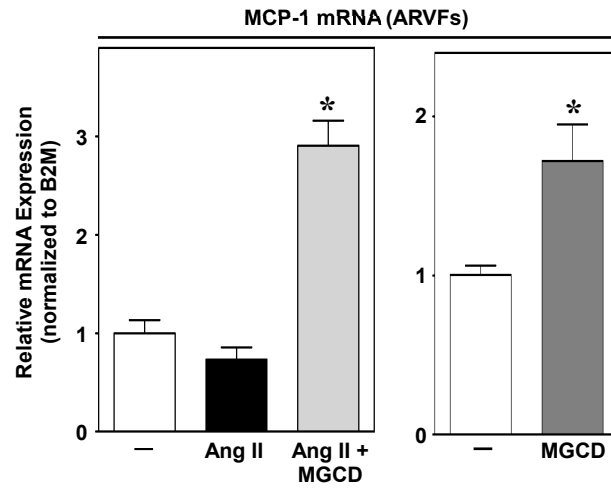

Supplement: NIHMS600422-supplement-sFigures_1_-_8.pdf [file NIHMS600422-supplement-sFigures_1_-_8.pdf]
